# Supplementary material for: Establishing In-House Cutoffs of CSF Alzheimer’s Disease Biomarkers for the AT(N) Stratification of the Alzheimer Center Barcelona Cohort
Source: Int J Mol Sci. 2022 Jun 21;23(13):6891. doi: 10.3390/ijms23136891 (PMC9266894; doi:10.3390/ijms23136891)
Supplement: Supplementary file 1 [file ijms-23-06891-s001.zip › Supplemental Tables.pdf]

Supplemental Table S1. Study 1 SCD participants of FACEHBI study excluded as controls. Participants of the FACEHBI that underwent LP (n=55).Of them, n=2 had PET positive (SUVR>1.45) and were clinically diagnosed as MCI, n=6 had PET positive and n=2 were clinically diagnosed as MCI. The average time window between LP and FBB-PET evaluations was 1.3 ±1.4 months (range -1.68 to 5.29 months).

| SCD<br>excluded<br>(n) | FBB-PET<br>(V2) | MCI Clinical<br>Diagnosis |
|------------------------|-----------------|---------------------------|
| 2                      | +               | +                         |
| 6                      | +               | -                         |
| 2                      | -               | +                         |

SCD: subjective cognitive decline, FACEHBI: Fundació ACE Health Brain Study, LP: Lumbar Puncture, MCI: mild cognitive impairment, FBB-PET: 18F-Florbetaben-labeled positron emission tomography (FBB-PET), SUVR: FBB-PET global standardized uptake value ratio.

Supplemental Table S2. Study 2 Comparison of Immunoassay. Description statistics of CSF biomarkers concentrations obtained by ELISA and CLEIA methods in the correlation study.

| Assay                             | N   | Mean  | Median | Std. Deviation | Minimum | Maximum |
|-----------------------------------|-----|-------|--------|----------------|---------|---------|
| A $\beta$ 1-42 ELISA              | 519 | 743   | 676    | 272            | 115     | 1426    |
| A $\beta$ 1-42 CLEIA <sup>a</sup> | 519 | 776   | 697    | 356            | 197     | 2282    |
| hTAU ELISA                        | 364 | 414   | 376    | 203            | 94      | 968     |
| hTAU CLEIA <sup>a</sup>           | 364 | 477   | 439    | 222            | 97      | 1087    |
| P181TAU ELISA                     | 77  | 70    | 63     | 34             | 16      | 180     |
| P181TAU CLEIA <sup>b</sup>        | 77  | 81    | 60     | 57             | 15      | 332     |
| A $\beta$ 1-40 ELISA              | 44  | 14499 | 14083  | 3182           | 6354    | 22220   |
| A $\beta$ 1-40 CLEIA <sup>b</sup> | 44  | 12386 | 11833  | 3192           | 5066    | 20284   |

CSF: cerebrospinal fluid, ELISA: enzyme-linked immunosorbent assay, CLEIA: chemiluminescence enzyme immunoassay. Description Statistics were given in pg/ml. <sup>a</sup>Launched by Fujirebio in April 2017. <sup>b</sup>Launched by Fujirebio in October 2018

Supplemental Table S3. Study 2 Comparison of Immunoassays. Summary of Passing-Bablok regression analysis of automated CLEIA and manual ELISA

| Biomarkers     | n   | Slope | 95%IC slope  | Intercept | 95%IC intercept     |
|----------------|-----|-------|--------------|-----------|---------------------|
| A $\beta$ 1-42 | 519 | 1.20  | 1.15 to 1.26 | -126.5    | -159.6 to -92.72    |
| hTAU           | 364 | 1.12  | 1.09 to 1.14 | 10.52     | 1.09 to 20.4        |
| p181TAU        | 77  | 1.54  | 1.42 to 1.66 | -28.48    | -35.33 to -19.63    |
| A $\beta$ 1-40 | 44  | 1.03  | 0.85 to 1.22 | -2707.21  | -5338.50 to -233.23 |

ELISA: enzyme-linked immunosorbent assay, CLEIA: chemiluminescence enzyme immunoassay. Regression analysis data for all biomarkers were given in pg/ml

Supplemental Table S4: Study 3 Concordance between immunoassays. Demographic, clinical, genetic and biomarker data measured with manual ELISA and automated CLEIA.

|                                   | All               | MCI               | Dementia          | $\chi^2$ /T test /U | p-value |
|-----------------------------------|-------------------|-------------------|-------------------|---------------------|---------|
| n (%)                             | 68(100%)          | 48 (71%)          | 20 (29%)          |                     |         |
| Age, years                        | 72.4 (7.5)        | 70.8 (7.29)       | 78.3 (6.6)        | 2.89                | 0.005   |
| Gender, Female/Male<br>(% Female) | 37/58(54%)        | 24/24 (50%)       | 13/7 (65%)        | 0.75                | 0.387   |
| APOE $\epsilon$ 4 +/- (%+) (n=67) | 25/42(37%)        | 17/31 (35%)       | 8/11 (42%)        | 0.05                | 0.818   |
| MMSE score                        | 24.4 (3.8)        | 26.2(2.7)         | 20.2 (2.8)        | 8.30                | <0.0001 |
| <b>CSF biomarkers, ELISA</b>      |                   |                   |                   |                     |         |
| A $\beta$ 1-42                    | 786 $\pm$ 308     | 816 $\pm$ 336     | 717 $\pm$ 337     | 382.50              | 0.189   |
| A $\beta$ 1-40                    | 14033 $\pm$ 3749  | 13724 $\pm$ 3625  | 14775 $\pm$ 4029  | 390.00              | 0.226   |
| t-Tau                             | 396 $\pm$ 321     | 313 $\pm$ 145     | 594 $\pm$ 502     | 316.50              | 0.028   |
| p181Tau                           | 63 $\pm$ 33       | 56 $\pm$ 22       | 81 $\pm$ 46       | 322.50              | 0.034   |
| A $\beta$ 1-42/A $\beta$ 1-40     | 0.058 $\pm$ 0.023 | 0.062 $\pm$ 0.022 | 0.051 $\pm$ 0.021 | 390.00              | 0.053   |
| <b>CSF biomarkers, CLEIA</b>      |                   |                   |                   |                     |         |
| A $\beta$ 1-42                    | 838 $\pm$ 397     | 875 $\pm$ 422     | 747 $\pm$ 321     | 406.00              | 0.319   |
| A $\beta$ 1-40                    | 11945 $\pm$ 3519  | 11632 $\pm$ 3508  | 12697 $\pm$ 3519  | 378.00              | 0.170   |
| t-Tau                             | 496 $\pm$ 325     | 418 $\pm$ 189     | 685 $\pm$ 481     | 325.00              | 0.037   |
| p181Tau                           | 74 $\pm$ 56       | 61 $\pm$ 34       | 105 $\pm$ 83      | 305.00              | 0.018   |
| A $\beta$ 1-42/A $\beta$ 1-40     | 0.071 $\pm$ 0.027 | 0.076 $\pm$ 0.026 | 0.061 $\pm$ 0.025 | 303.00              | 0.017   |

MCI: Mild Cognitive Impairment, CSF: cerebrospinal fluid, APOE  $\epsilon$ 4: apolipoprotein allele  $\epsilon$ 4 carriers, MMSE: mini-mental state examination. Data are presented as mean (SD) otherwise specified. p values were calculated by comparing MCI and Dementia patients using Student's T-test,  $\chi^2$  and Mann-Whitney U. All biomarkers data were presented as pg/ml.

Supplemental Table S5. Cutoff comparison of CLEIA<sup>a</sup> assay

| Biomarkers                 | Source                                                     | AUC(95%IC)          | Cutoff <sup>b</sup> | Youden J Index | Sensitivity | Specificity |
|----------------------------|------------------------------------------------------------|---------------------|---------------------|----------------|-------------|-------------|
| A $\beta$ 42               |                                                            |                     |                     |                |             |             |
|                            | FACE                                                       | 0.927 (0.875-0.980) | <796                | 0.72           | 92          | 80          |
|                            | Fujirebio                                                  | 0.833 (0.747-0.918) | <599                | 0.597          | 78          | 81          |
|                            | Bayart <i>et al</i> <sup><i><math>\beta</math>7</i></sup>  | 0.79 (0.680-0.890)  | <381                | NA             | 77.3        | 81          |
|                            | Leitão <i>et al</i>                                        | 0.858 (0.783-0.933) | <543                | NA             | 85          | 78          |
| t-Tau                      |                                                            |                     |                     |                |             |             |
|                            | FACE                                                       | 0.952 (0.905-0.999) | >412                | 0.81           | 92          | 89          |
|                            | Fujirebio                                                  | 0.922 (0.858-0.922) | >404                | 0.857          | 95          | 91          |
|                            | Bayart <i>et al</i> <sup><i><math>\beta</math>7</i></sup>  | 0.9 (0.83-0.96)     | >381                | NA             | 86          | 83          |
|                            | Leitão <i>et al</i> <sup><i><math>\beta</math>8</i></sup>  | 0.968 (0.949-0.997) | >335                | NA             | 91          | 92          |
| p181Tau                    |                                                            |                     |                     |                |             |             |
|                            | FACE                                                       | 0.97 (0.939-1.000)  | >54                 | 0.83           | 92          | 91          |
|                            | Fujirebio                                                  | 0.995 (0.986-1.003) | >56.5               | 0.967          | 97          | 100         |
|                            | Leitão, <i>et al</i> <sup><i><math>\beta</math>8</i></sup> | 0.986 (0.969-1.000) | >50.6               | NA             | 96          | 95          |
| A $\beta$ 42/ A $\beta$ 40 |                                                            |                     |                     |                |             |             |
|                            | FACE                                                       | 0.993(0.982-1.000)  | <0.063              | 0.95           | 100         | 95          |
|                            | Fujirebio                                                  | 0.976(0.947-1.004)  | <0.069              | 0.89           | 98          | 91          |
|                            | Leitão, <i>et al</i> <sup><i><math>\beta</math>8</i></sup> | 0.960(0.960-1.000)  | <0.068              | NA             | 97.5        | 92.5        |

ROC: receiver operating characteristic, AUC: area under the curve, CSF: cerebrospinal fluid, <sup>a</sup>CLEIA: chemluminescence enzyme immunoassay. <sup>b</sup>Cutoff for single biomarkers are given in pg/ml. NA: not available. FACE: Fundació ACE

Supplemental Table S6. RHO spearman coefficients among statistically significant variables associated to MCI to Dementia phenoconversion

|                | ATN categories | AGE     | MMSE    | MCI categories |
|----------------|----------------|---------|---------|----------------|
| ATN Categories | 1              | ,273**  | -,193** | ,287**         |
| AGE            | ,273**         | 1       | -,321** | ,301**         |
| Baseline MSE   | -,193**        | -,321** | 1       | -,339**        |
| MCI categories | ,287**         | ,301**  | -,339** | 1              |

\*\* p<0.01
